# Supplementary material for: Myxococcus xanthus Gliding Motors Are Elastically Coupled to the Substrate as Predicted by the Focal Adhesion Model of Gliding Motility
Source: PubMed Central journal article supplement (PMC4014417; doi:10.1371/journal.pcbi.1003619), 2014-05-08
Supplement: pcbi.1003619.s007.pdf [file pcbi.1003619.s007.pdf]

Table S1: Parameters used in flexible cell model

| <b>Symbol</b>     | <b>Description</b>                        | <b>Value</b>                      |
|-------------------|-------------------------------------------|-----------------------------------|
| $L$               | Cell length                               | 6.5 $\mu\text{m}$ [4,33]          |
| $W$               | Cell width                                | 0.5 $\mu\text{m}$ [4,33]          |
| $N$               | Number of nodes per cell                  | 7                                 |
| $N_a$             | Number of adhesion complexes              | 5 [14,22]                         |
| $\rho$            | Cell density                              | 1000 $\text{kg}/\text{m}^3$       |
| $k_l$             | Linear spring constant                    | Managed by Box2D                  |
| $k_b$             | Angular spring constant/bending stiffness | $10^{-17}$ N.m [33-35]            |
| $k_a$             | Substrate attachment spring constant      | 50-2000 pN/ $\mu\text{m}$ [20,21] |
| $L_{\text{max}}$  | Bond breaking length                      | 0.5 $\mu\text{m}$ (cell width)    |
| $v^f$             | Mean speed of the cell                    | 4 $\mu\text{m}/\text{min}$ [40]   |
| $t_{\text{step}}$ | Simulation time step                      | $5 \times 10^{-3}$ sec            |
| $\mu$             | Viscosity of the slime                    | $10^{-3}$ kg/m.s                  |
| $F^p$             | Propulsive force per cell                 | 60 pN                             |
