# Supplementary material for: Myxococcus xanthus Gliding Motors Are Elastically Coupled to the Substrate as Predicted by the Focal Adhesion Model of Gliding Motility
Source: PLOS journal article supplement (doi:10.1371/journal.pcbi.1003619), 2014-05-08
Supplement: S4 (10.1371/journal.pcbi.1003619.s004) [file journal.pcbi.1003619.s004]

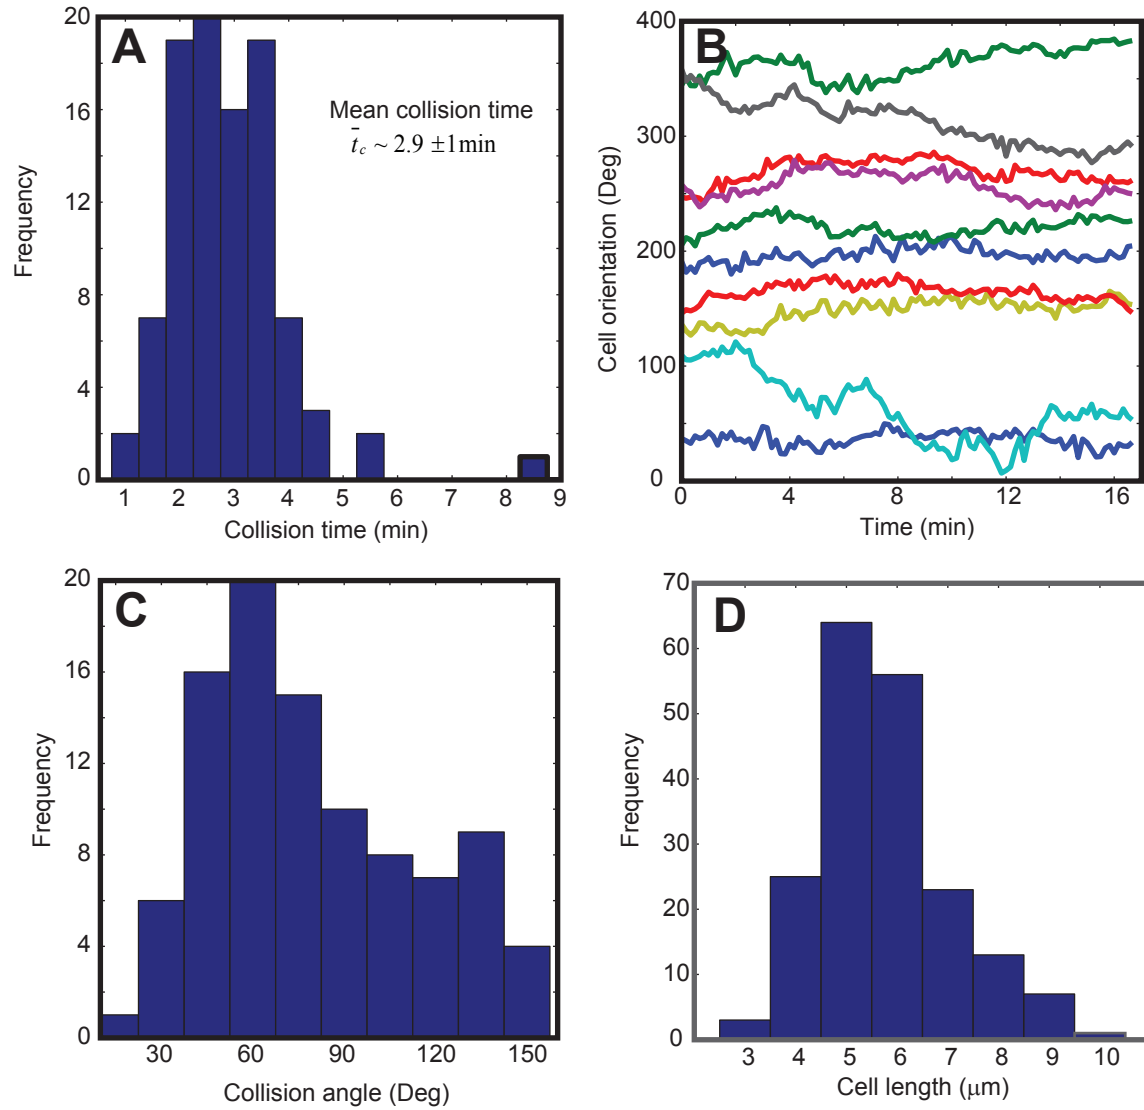

Figure S4: **Cell properties measured in experimental data for wild-type cells.** (A) Distribution of collision times from the experimental data of wild-type cells. (B) Tracking history of individual cell orientations over time indicating the spontaneous random cell orientation changes. Each trajectory/color represents measurements from a single isolated cell. (C) The distribution of collision angles and (D) cell lengths from wild-type cell data.
